# Supplementary material for: Characterizing the urinary proteome of prematurity-associated lung disease in school-aged children
Source: Springer Nature journal article supplement (doi:10.1186/s12931-023-02494-3), 2023-07-20

## Characterizing the urinary proteome of prematurity-associated lung disease in school-aged children - Additional

### File:

Christopher W Course<sup>1</sup>, Philip A Lewis<sup>2</sup>, Sarah J Kotecha<sup>1</sup>, Michael Cousins<sup>1,3</sup>, Kylie Hart<sup>3</sup>, W John Watkins<sup>1</sup>, Kate J Heesom<sup>2</sup>, Sailesh Kotecha<sup>1</sup>.

<sup>1</sup>Department of Child Health, School of Medicine, Cardiff University, Cardiff, United Kingdom.

<sup>2</sup>Proteomics Facility, Faculty of Life Sciences, University of Bristol, Bristol, United Kingdom

<sup>3</sup>Department of Paediatrics, Cardiff and Vale University Health Board, Cardiff, United Kingdom

**Corresponding Author:** Professor Sailesh Kotecha  
Department of Child Health  
Cardiff University School of Medicine  
Heath Park  
Cardiff CF14 4XN  
United Kingdom  
[kotechas@cardiff.ac.uk](mailto:kotechas@cardiff.ac.uk)

**Additional File Table 1:** Comparing included and excluded samples: POLD: Prematurity-related obstructive lung disease. pPRISm: Prematurity-related preserved ratio with impaired spirometry.

| Variable                                        | Term born ( $\geq 37/40$ ) |             | Preterm born ( $\leq 34/40$ ) |             | Preterm born Controls |             | POLD             |                  | pPRISm      |             |
|-------------------------------------------------|----------------------------|-------------|-------------------------------|-------------|-----------------------|-------------|------------------|------------------|-------------|-------------|
|                                                 | Included                   | Excluded    | Included                      | Excluded    | Included              | Excluded    | Included         | Excluded         | Included    | Excluded    |
|                                                 | n = 46                     | n = 20      | n = 160                       | n = 44      | n = 112               | n = 28      | n = 21           | n = 6            | n = 27      | n = 10      |
| Sex (male), n(%)                                | 23 (50.0)                  | 11 (55)     | 76 (47.5)                     | 22 (50)     | 52 (46.4)             | 14 (50)     | 7 (33.3)         | 3 (50)           | 17 (63)     | 5 (50)      |
| Ethnicity (white), n(%)                         | 45 (97.8)                  | 20 (100)    | 152 (95)                      | 42 (95.5)   | 105 (93.8)            | 26 (92.9)   | 20 (95.2)        | 6 (100)          | 27 (100)    | 10 (100)    |
| Age at testing (years), mean (SD)               | 9.9 (1.1)                  | 10.3 (1.0)  | 10.4 (1.4)                    | 10.4 (1.3)  | 10.4 (1.3)            | 10.0 (1.3)  | 10.1 (1.7)       | 10.9 (1.2)       | 10.6 (1.6)  | 11.3 (1.0)  |
| Weight (kg), mean (SD)                          | 36.3 (10.3)                | 36.1 (10.4) | 35.9 (9.7)                    | 37.2 (10.9) | 36.4 (9.5)            | 36.7 (11.7) | 33.9 (11.8)      | 36.0 (9.0)       | 35.5 (9.1)  | 39.2 (10.6) |
| Body Mass Index (kg/m <sup>2</sup> ), mean (SD) | 18.1 (3.2)                 | 17.3 (3.0)  | 17.5 (3.1)                    | 18.4 (3.6)  | 17.7 (3.0)            | 18.6 (3.8)  | 17.0 (3.9)       | 17.7 (2.8)       | 17.0 (2.9)  | 18.2 (3.7)  |
| Wheeze-ever, n(%)                               | 12 (26.1)                  | 5 (25)      | 97 (56.9)                     | 22 (50)     | 64 (57.1)             | 16 (57.1)   | 18 (85.7)        | 3 (50)           | 15 (55.6)   | 3 (30)      |
| Doctor-diagnosed asthma, n(%)                   | 2 (4.3)                    | 1 (5)       | 39 (24.4)                     | 5 (11.4)    | 21 (18.8)             | 3 (10.7)    | <b>11 (52.4)</b> | <b>0 (0)*</b>    | 7 (25.9)    | 2 (20)      |
| <b>Neonatal Characteristics</b>                 |                            |             |                               |             |                       |             |                  |                  |             |             |
| Gestational age (weeks), mean (SD)              | 40.1 (1.2)                 | 40.4 (1.1)  | 30.5 (2.8)                    | 30.5 (3.0)  | 30.4 (2.9)            | 30.8 (3.1)  | 30.2 (2.5)       | 28.6 (2.7)       | 30.9 (2.9)  | 31.0 (2.5)  |
| Birthweight (g), mean (SD)                      | 3499 (576)                 | 3650 (627)  | 1549 (594)                    | 1575 (650)  | 1577 (607)            | 1642 (672)  | 1352 (572)       | 1050 (428)       | 1587 (543)  | 1702 (590)  |
| Birthweight (z-score), mean (SD)                | 0.1 (0.99)                 | 0.2 (1.2)   | 0.11 (1.37)                   | 0.15 (1.52) | 0.3 (1.42)            | 0.3 (1.6)   | -0.45 (1.46)     | -0.82 (1.20)     | -0.12 (0.9) | 0.3 (1.4)   |
| Intrauterine growth restriction, n(%)           | 3 (6.5)                    | 2 (10)      | 25 (15.6)                     | 7 (15.9)    | 15 (13.4)             | 3 (10.7)    | 8 (38.1)         | 3 (50)           | 2 (7.4)     | 1 (10)      |
| Antenatal Steroids, n(%)                        | 0 (0)                      | 0 (0)       | 137 (85.6)                    | 39 (88.6)   | 99 (88.4)             | 24 (85.7)   | 16 (76.2)        | 6 (100)          | 22 (81.5)   | 9 (90)      |
| Mechanical ventilation, n(%)                    | 0 (0)                      | 0 (0)       | 70 (43.8)                     | 18 (40.9)   | 53 (47.3)             | 11 (39.3)   | 10 (47.6)        | 5 (83.3)         | 7 (25.9)    | 2 (20)      |
| BPD, n(%)                                       | 0 (0)                      | 0 (0)       | 47 (29.2)                     | 14 (31.8)   | 34 (30.4)             | 7 (25)      | <b>6 (28.6)</b>  | <b>5 (83.3)*</b> | 7 (25.9)    | 2 (20)      |
| Antenatal smoking, n(%)                         | 3 (6.5)                    | 0 (0)       | 22 (13.8)                     | 5 (1.4)     | 16 (14.3)             | 4 (14.3)    | 2 (9.5)          | 0 (0)            | 4 (14.8)    | 1 (10)      |

Independent samples T-test/Chi-squared test; Included vs Excluded: \*p<0.05, \*\*p<0.01, \*\*\*p<0.001

POLD: Prematurity-related obstructive lung disease. pPRISm: Prematurity-related preserved ratio with impaired spirometry. BPD: Bronchopulmonary dysplasia. BDR: bronchodilator response. FE<sub>NO</sub>: fraction exhaled nitric oxide.

**Additional File Figure 1:** Log<sub>2</sub> total protein abundance of each sample separated by mass spectrometry (MS) run (given in number above each graph). Solid red line represents median of total protein abundance of each MS run, with dashed lines representing  $\pm 2$ -fold difference of MS run median total protein abundance. Samples with a total protein abundance  $> \pm 2$ -fold difference from median of total protein abundance of the MS run highlighted in red as outliers and excluded from further analysis.

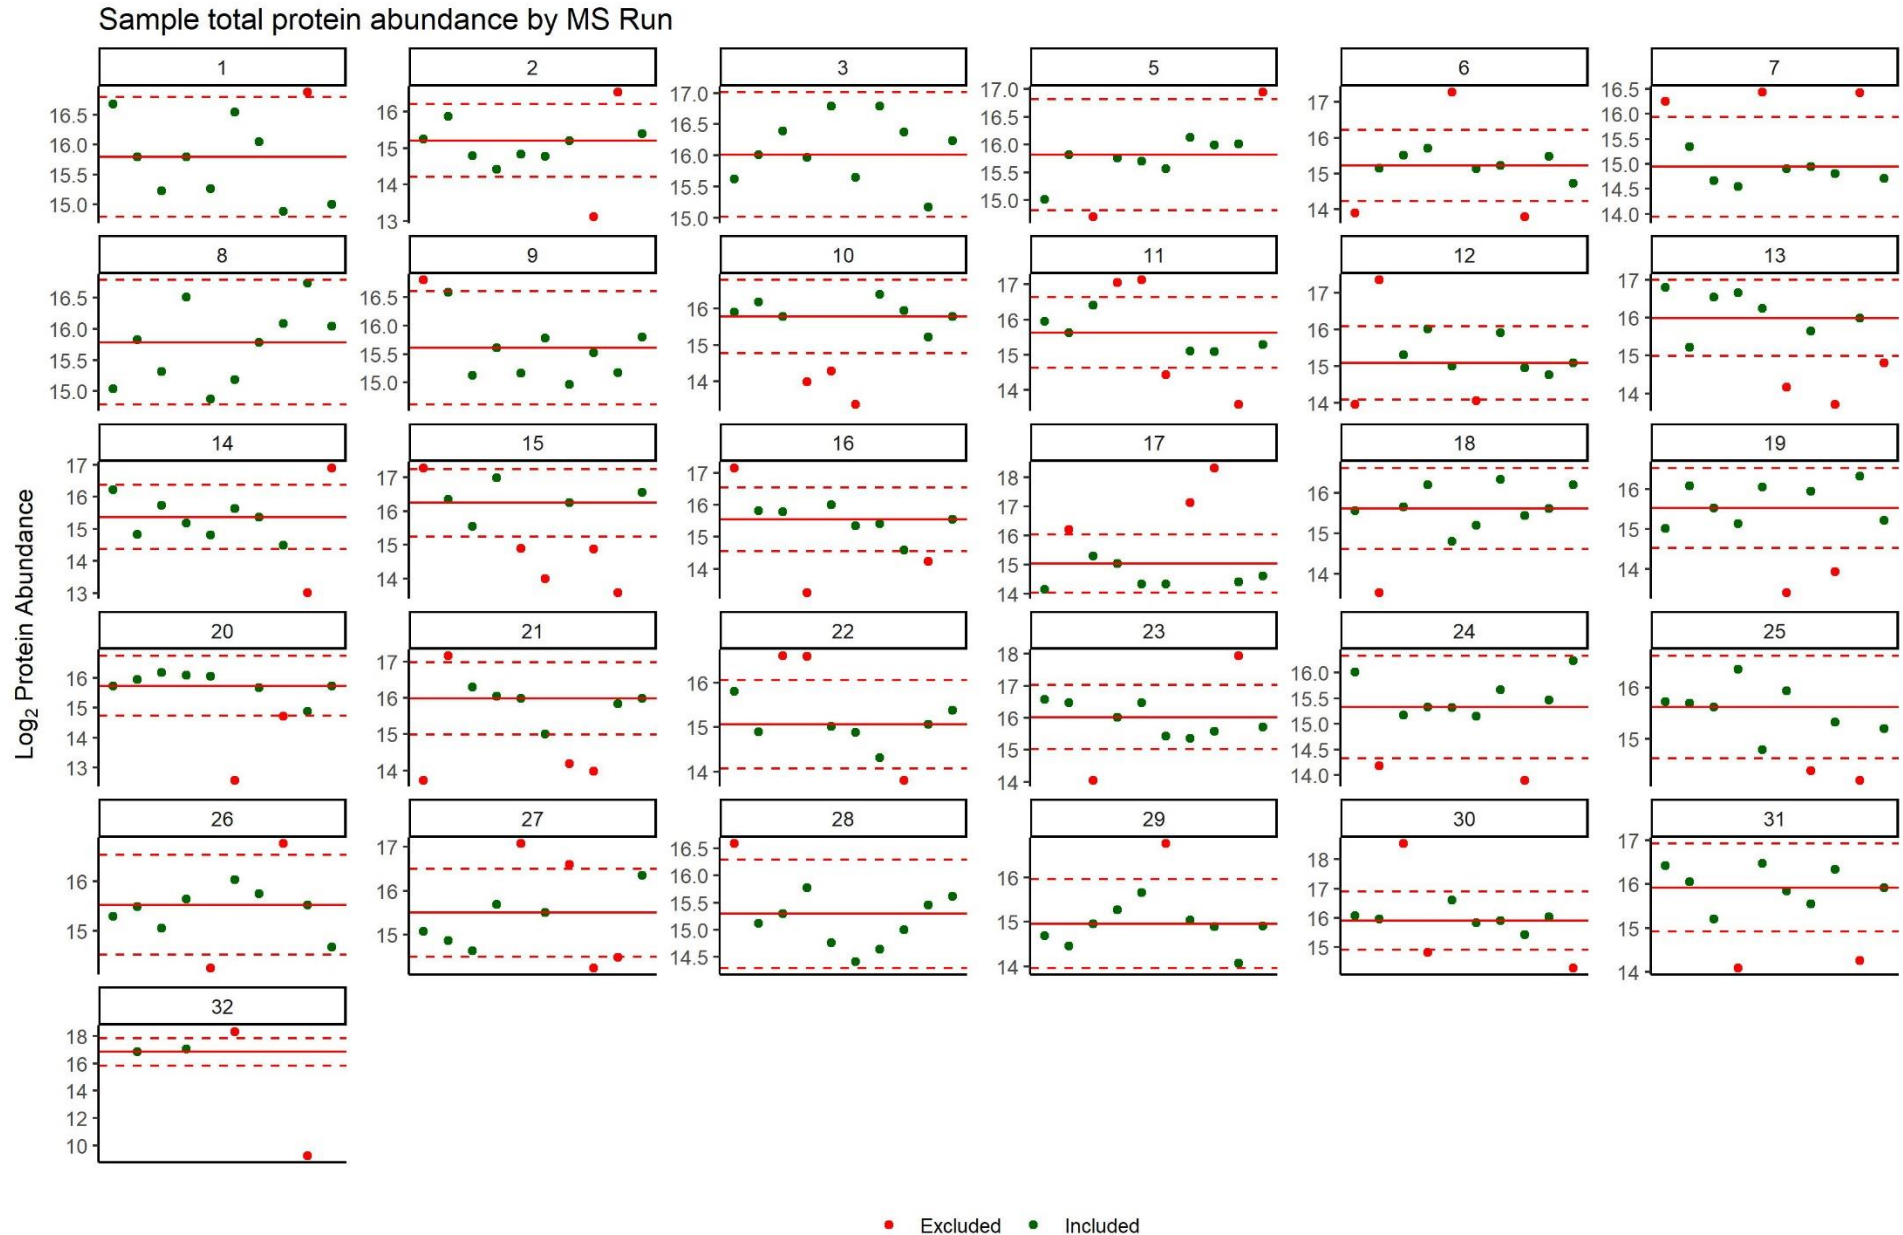

**Additional File Figure 2:** Functional enrichment analysis of detected urine proteome. Black bar on each column represents the expected background enrichment level. **A**

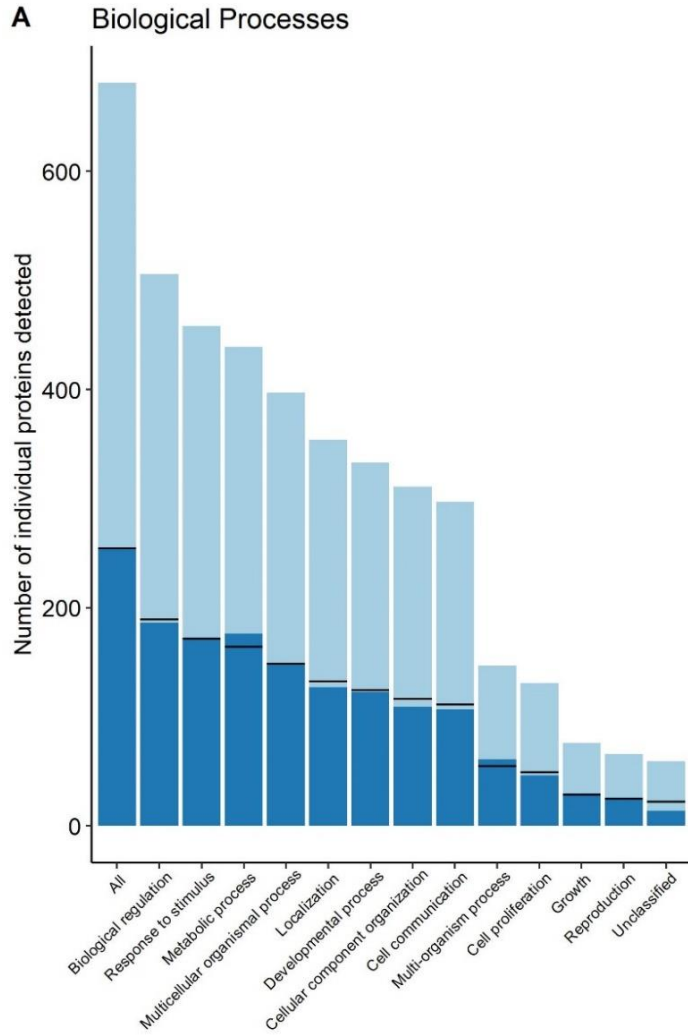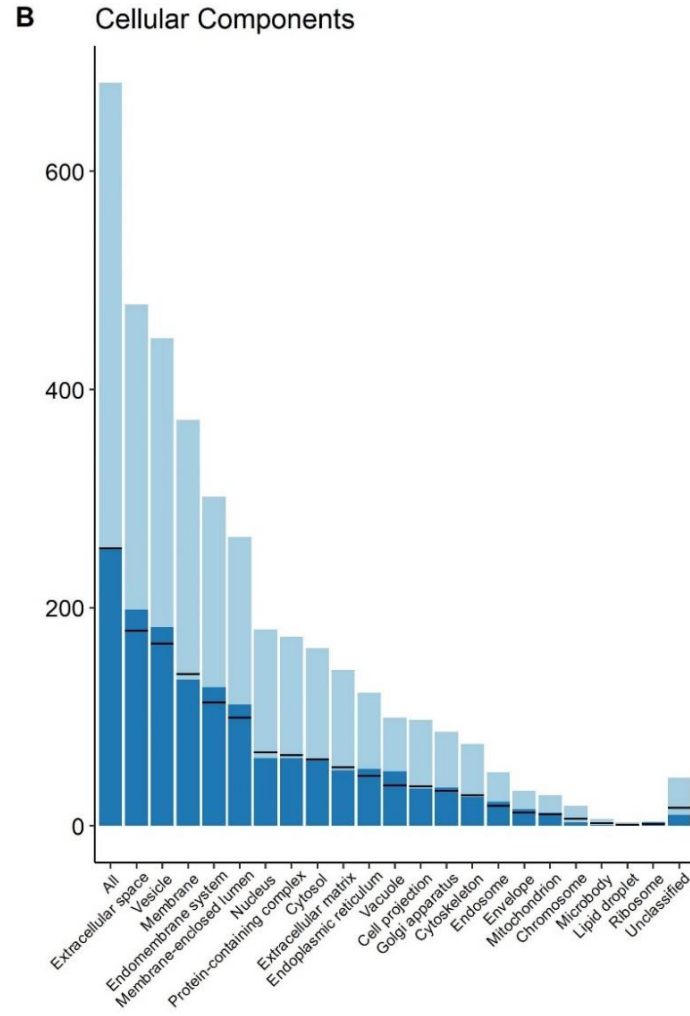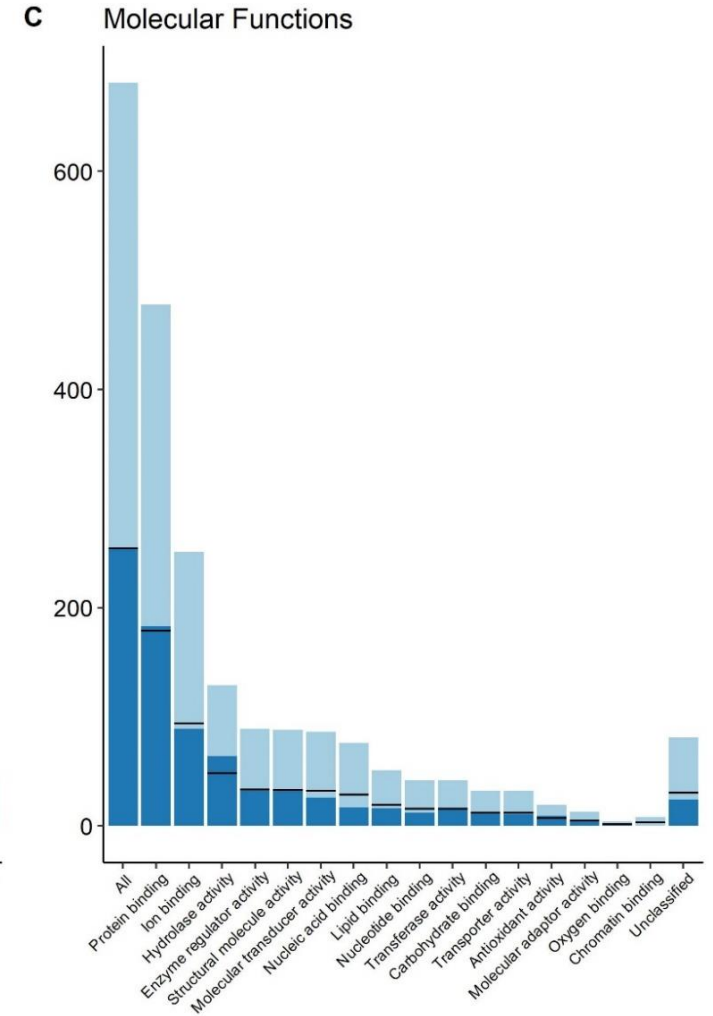

■ No Significant Difference Detected
 ■ Significant Difference Detected

**Additional file Table 2:** Significantly altered protein abundances between pPRISm vs PTC.

| UniProt Accession | Gene Name | Protein Name                                               | Protein Function                                                   | pPRISm vs PTC (n = 27 v 112) |                     |        |
|-------------------|-----------|------------------------------------------------------------|--------------------------------------------------------------------|------------------------------|---------------------|--------|
|                   |           |                                                            |                                                                    | Replicates                   | Log <sub>2</sub> FC | p      |
| P06280            | GLA       | Alpha-galactosidase A                                      | Lipid metabolism                                                   | 2 v 6                        | -1.06               | 0.0001 |
| Q9Y240            | CLEC11A   | C-type lectin domain family 11 member A                    | Osteogenesis                                                       | 3 v 15                       | -1.39               | 0.001  |
| A0A2U8J8Y8        | IgH       | Ig heavy chain variable region                             | Immune response                                                    | 2 v 6                        | -1.86               | 0.002  |
| O96009            | NAPSA     | Napsin-A                                                   | May be involved in processing of pneumocyte surfactant precursors. | 3 v 17                       | 1.01                | 0.003  |
| Q16378            | PRR4      | Proline-rich protein 4                                     | Extracellular space/Visual perception                              | 2 v 15                       | 0.83                | 0.005  |
| Q9H497            | TOR3A     | Torsin-3A                                                  | Nucleotide binding                                                 | 5 v 17                       | -1.28               | 0.006  |
| Q96NL6            | SCLT1     | Sodium channel and clathrin linker 1                       | Anchors basal body to plasma membrane                              | 3 v 11                       | -1.34               | 0.009  |
| P54802            | NAGLU     | Alpha-N-acetylglucosaminidase                              | Glycosidase/hydrolase                                              | 25 v 107                     | -0.34               | 0.011  |
| O75594            | PGLYRP1   | Peptidoglycan recognition protein 1                        | Innate immunity                                                    | 27 v 112                     | -0.40               | 0.012  |
| P24855            | DNASE1    | Deoxyribonuclease-1                                        | Serum endonuclease                                                 | 27 v 112                     | -0.53               | 0.013  |
| P35579            | MYH9      | Myosin-9                                                   | Cell adhesion/cell shape                                           | 4 v 8                        | 0.49                | 0.014  |
| P01011            | SERPINA3  | Alpha-1-antichymotrypsin                                   | Serine protease inhibitor                                          | 25 v 100                     | -0.36               | 0.014  |
| O60911            | CTSV      | Cathepsin L2                                               | Thiol protease                                                     | 16 v 73                      | -0.33               | 0.015  |
| Q99674            | CGREF1    | Cell growth regulator with EF hand domain protein 1        | Cell adhesion, cell cycle                                          | 7 v 22                       | 0.51                | 0.016  |
| Q96ED9            | HOOK2     | Protein Hook homolog 2                                     | Protein transport                                                  | 6 v 24                       | -0.74               | 0.017  |
| P01019            | AGT       | Angiotensinogen (Serpina8)                                 | Regulation of blood pressure                                       | 4 v 28                       | 0.81                | 0.019  |
| Q6PIJ6            | FBXO38    | F-box only protein 38                                      | Adaptive immune response                                           | 2 v 11                       | 1.70                | 0.020  |
| P13727            | PRG2      | Bone marrow proteoglycan                                   | Immune response, antimicrobial                                     | 22 v 91                      | -0.41               | 0.020  |
| Q6SPF0            | SAMD1     | Sterile alpha motif domain-containing protein 1            | Chromatin regulator                                                | 13 v 63                      | -0.60               | 0.021  |
| Q9NZP8            | C1RL      | Complement C1r subcomponent-like protein                   | Serine protease, complement pathway                                | 25 v 105                     | -0.45               | 0.021  |
| Q01459            | CTBS      | Di-N-acetylchitobiase                                      | Glycosidase                                                        | 19 v 87                      | -0.34               | 0.022  |
| Q96TA2            | YME1L1    | ATP-dependent zinc metalloprotease YME1L1                  | Metalloprotease                                                    | 21 v 80                      | 0.43                | 0.022  |
| Q9ULI3            | HEG1      | Protein HEG homolog 1                                      | Developmental protein, heart and vessel formation                  | 27 v 111                     | 0.25                | 0.025  |
| P04083            | ANXA1     | Annexin A1                                                 | Inflammatory/immune response                                       | 7 v 29                       | 1.46                | 0.026  |
| Q6UXB4            | CLEC4G    | C-type lectin domain family 4 member G                     | Substrate binder, cell receptor for virus entry                    | 27 v 106                     | -0.36               | 0.028  |
| P19835            | CEL       | Bile salt-activated lipase                                 | Serine esterase, lipid degradation                                 | 12 v 64                      | -0.38               | 0.031  |
| B1AHL2            | FBLN1     | Fibulin-1                                                  | Cell adhesion/migration                                            | 4 v 24                       | 0.49                | 0.031  |
| P11684            | SCGB1A1   | Uteroglobin                                                | Phospholipase A2 inhibitor                                         | 5 v 33                       | -1.04               | 0.032  |
| P58400            | NRXN1     | Neurexin-1-beta                                            | Cell adhesion                                                      | 26 v 107                     | 0.24                | 0.032  |
| P62979            | RPS27A    | Ubiquitin-40S ribosomal protein S27a                       | Ribonucleoprotein                                                  | 27 v 111                     | 0.51                | 0.035  |
| A0A0J9YVZ3        | MGAM      | Maltase-glucoamylase, intestinal                           | Carbohydrate metabolism                                            | 27 v 112                     | -0.35               | 0.038  |
| P43121            | MCAM      | Cell surface glycoprotein MUC18                            | Cell adhesion                                                      | 21 v 87                      | -0.45               | 0.039  |
| P21815            | IBSP      | Bone sialoprotein 2                                        | Biom mineralization, cell adhesion                                 | 26 v 101                     | 0.33                | 0.040  |
| P61769            | B2M       | Beta-2-microglobulin                                       | Class I major histocompatibility complex                           | 27 v 112                     | -0.60               | 0.040  |
| P15144            | ANPEP     | Aminopeptidase N                                           | Aminopeptidase                                                     | 23 v 103                     | -0.37               | 0.040  |
| O95967            | EFEMP2    | EGF-containing fibulin-like extracellular matrix protein 2 | Elastic fibre formation                                            | 25 v 101                     | 0.30                | 0.043  |
| P08571            | CD14      | Monocyte differentiation antigen CD14                      | Immune and inflammatory response                                   | 27 v 112                     | -0.39               | 0.045  |

**Additional file Table 3: : Significantly altered protein abundances between pPRISm vs Term-born children**

| UniProt Accession | Gene Name | Protein Name                                                          | Protein Function                           | pPRISm vs Term (n = 27 v 46) |                     |        |
|-------------------|-----------|-----------------------------------------------------------------------|--------------------------------------------|------------------------------|---------------------|--------|
|                   |           |                                                                       |                                            | Replicates                   | Log <sub>2</sub> FC | p      |
| Q08380            | LGALS3BP  | Galectin-3-binding protein                                            | Cell adhesion                              | 27 v 46                      | -0.57               | 0.0001 |
| P17936            | IGFBP3    | Insulin-like growth factor-binding protein 3                          | Growth regulation                          | 18 v 31                      | 1.44                | 0.0001 |
| P43652            | AFM       | Afamin                                                                | Protein transport                          | 27 v 46                      | 0.39                | 0.001  |
| A0A2U8J953        | IgH       | Ig heavy chain variable region (Fragment)                             | Immune response                            | 9 v 7                        | -2.45               | 0.001  |
| O15240            | VGF       | Neurosecretory protein VGF                                            | Neurogenesis/neuroplasticity               | 27 v 46                      | -0.67               | 0.001  |
| P21802            | FGFR2     | Fibroblast growth factor receptor 2                                   | Cell proliferation regulator               | 8 v 8                        | -0.93               | 0.002  |
| Q16378            | PRR4      | Proline-rich protein 4                                                | Extracellular space/Visual perception      | 2 v 7                        | 1.48                | 0.003  |
| P58400            | NRXN1     | Neurexin-1-beta                                                       | Cell adhesion                              | 26 v 46                      | 0.44                | 0.003  |
| Q9UL78            | Unknown   | Myosin-reactive immunoglobulin light chain variable region (Fragment) | Unknown                                    | 22 v 46                      | -0.44               | 0.003  |
| P25311            | AZGP1     | Zinc-alpha-2-glycoprotein                                             | Lipid degradation                          | 27 v 46                      | -0.50               | 0.003  |
| P05062            | ALDOB     | Fructose-bisphosphate aldolase B                                      | Glycolysis                                 | 23 v 46                      | -0.57               | 0.003  |
| P13727            | PRG2      | Proteoglycan 2                                                        | Immune response, antimicrobial             | 22 v 38                      | -0.57               | 0.004  |
| Q9Y240            | CLEC11A   | C-type lectin domain family 11 member                                 | Osteogenesis                               | 3 v 9                        | -1.73               | 0.005  |
| P01019            | AGT       | Angiotensinogen (Serpin A8)                                           | Regulation of blood pressure               | 4 v 8                        | 1.28                | 0.005  |
| P08571            | CD14      | Monocyte differentiation antigen CD14                                 | Immune and inflammatory response           | 27 v 46                      | -0.62               | 0.005  |
| P02656            | APOC3     | Apolipoprotein C                                                      | Lipid metabolism                           | 16 v 26                      | -1.67               | 0.006  |
| Q96ED9            | HOOK2     | Protein Hook homolog 2                                                | Protein transport                          | 6 v 16                       | -0.87               | 0.007  |
| O60911            | CTSV      | Cathepsin L2                                                          | Thiol protease                             | 16 v 39                      | -0.36               | 0.008  |
| Q96GW7            | BCAN      | Brevican core protein                                                 | Nervous system development                 | 26 v 34                      | -0.73               | 0.008  |
| Q8TE24            | MGAM      | Maltase-glucoamylase                                                  | Carbohydrate metabolism                    | 5 v 7                        | -1.31               | 0.008  |
| Q6SPF0            | SAMD1     | Sterile alpha motif domain-containing protein 1                       | Chromatin regulator                        | 13 v 28                      | -0.72               | 0.009  |
| Q99985            | SEMA3C    | Semaphorin-3C                                                         | Developmental protein                      | 6 v 14                       | 2.72                | 0.010  |
| Q16610            | ECM1      | Extracellular matrix protein 1                                        | Multifunctional, protease binding          | 6 v 15                       | -0.94               | 0.011  |
| Q9NQ76            | MEPE      | Matrix extracellular phosphoglycoprotein                              | Post-translational protein phosphorylation | 10 v 5                       | 1.29                | 0.011  |
| Q92820            | GGH       | Gamma-glutamyl hydrolase                                              | Hydrolase                                  | 27 v 46                      | -0.50               | 0.011  |
| Q4TZM4            | HBB       | Hemoglobin beta chain                                                 | Oxygen transport                           | 5 v 7                        | 1.47                | 0.013  |
| P02750            | LRG1      | Leucine-rich alpha-2-glycoprotein                                     | Extracellular protein                      | 25 v 46                      | -0.51               | 0.014  |
| Q8NEJ1            | Unknown   | Uncharacterized protein                                               | Unknown                                    | 4 v 7                        | -0.87               | 0.016  |
| P09668            | CTSH      | Pro-cathepsin H                                                       | Lysosomal protein degradation              | 11 v 15                      | -0.80               | 0.016  |
| Q02818            | NUCB1     | Nucleobindin-1                                                        | Calcium/G-protein binding                  | 16 v 39                      | -0.54               | 0.017  |
| Q9NZP8            | C1RL      | Complement C1r subcomponent-like protein                              | Serine protease, complement pathway        | 25 v 45                      | -0.50               | 0.017  |
| P51170            | SCNN1G    | Amiloride-sensitive sodium channel subunit gamma                      | Ion channel                                | 2 v 9                        | 0.91                | 0.018  |
| Q9H497            | TOR3A     | Torsin-3A                                                             | Nucleotide binding                         | 5 v 6                        | -2.00               | 0.018  |
| A0A0X9UWL5        | Unknown   | GCT-A5 light chain variable region (Fragment)                         | Unknown                                    | 22 v 46                      | -0.41               | 0.019  |
| P09603            | CSF1      | Macrophage colony-stimulating factor 1                                | Cytokine                                   | 26 v 39                      | 0.45                | 0.019  |
| Q9H665            | IGFLR1    | IGF-like family receptor 1                                            | Cell membrane receptor IGF                 | 24 v 34                      | -0.36               | 0.019  |
| O00560            | SDCBP     | Syntenin-1                                                            | Multifunctional protein trafficker         | 2 v 24                       | 0.49                | 0.020  |
| Q01469            | FABP5     | Fatty acid-binding protein 5                                          | Lipid metabolism                           | 5 v 20                       | -0.75               | 0.024  |
| P02766            | TTR       | Transthyretin                                                         | Thyroid hormone-binding protein            | 26 v 41                      | 0.53                | 0.026  |

|        |            |                                                                       |                                        |         |       |       |
|--------|------------|-----------------------------------------------------------------------|----------------------------------------|---------|-------|-------|
| P69905 | HBA1; HBA2 | Hemoglobin subunit alpha                                              | Oxygen transport                       | 10 v 37 | 0.78  | 0.026 |
| Q9UQV4 | LAMP3      | Lysosome-associated membrane glycoprotein 3                           | Adaptive immunity                      | 16 v 34 | -0.51 | 0.027 |
| P08185 | SERPINA6   | Corticosteroid-binding globulin                                       | Glucocorticoid/progestin transport     | 19 v 34 | -0.55 | 0.028 |
| P13598 | ICAM2      | Intercellular adhesion molecule 2                                     | Leukocyte adhesion                     | 8 v 18  | 0.75  | 0.028 |
| P52848 | NDST1      | Bifunctional heparan sulfate N-deacetylase/N-sulfotransferase 1       | Multifunctional enzyme/immune response | 26 v 44 | -0.76 | 0.029 |
| Q99674 | CGREF1     | Cell growth regulator with EF hand domain protein 1                   | Cell adhesion, cell cycle              | 7 v 11  | 0.83  | 0.031 |
| O15370 | SOX12      | Transcription factor SOX-12                                           | Transcription factor                   | 4 v 7   | -1.72 | 0.034 |
| Q01459 | CTBS       | Di-N-acetylchitobiase                                                 | Glycosidase                            | 19 v 45 | -0.34 | 0.035 |
| Q9UL85 | Unknown    | Myosin-reactive immunoglobulin kappa chain variable region (Fragment) | Unknown                                | 13 v 33 | -1.01 | 0.035 |
| P42785 | PRCP       | Lysosomal Pro-X carboxypeptidase                                      | Carboxypeptidase                       | 6 v 28  | -0.86 | 0.036 |
| Q9Y646 | CPQ        | Carboxypeptidase Q                                                    | Carboxypeptidase                       | 5 v 7   | -1.34 | 0.036 |
| P60022 | DEFB1      | Beta-defensin 1                                                       | Bactericidal activity                  | 11 v 20 | -0.76 | 0.036 |
| P14384 | CPM        | Carboxypeptidase M                                                    | Carboxypeptidase                       | 20 v 30 | -0.38 | 0.038 |
| P07998 | RNASE1     | Ribonuclease pancreatic                                               | Endonuclease                           | 27 v 46 | 0.42  | 0.038 |
| P31025 | LCN1       | Lipocalin-1                                                           | Transport protein                      | 19 v 16 | -0.61 | 0.039 |
| Q96RR4 | CAMKK2     | Calcium/calmodulin-dependent protein kinase kinase 2                  | Serine/threonine-protein kinase        | 10 v 15 | -1.32 | 0.044 |
| P24821 | TNC        | Tenascin                                                              | Cell adhesion                          | 27 v 46 | 0.23  | 0.044 |
| P12111 | COL6A3     | Collagen alpha-3(VI) chain                                            | Cell adhesion                          | 27 v 46 | -0.41 | 0.045 |
| Q7Z3B1 | NEGR1      | Neuronal growth regulator 1                                           | Cell adhesion                          | 13 v 25 | -0.47 | 0.047 |
| Q5T1S8 | NCMAP      | Noncompact myelin-associated protein                                  | Myelin formation                       | 27 v 46 | -0.28 | 0.047 |
| P04083 | ANXA1      | Annexin A1                                                            | Inflammatory/immune response           | 7 v 20  | 1.31  | 0.047 |
| Q96PX8 | SLITRK1    | SLIT and NTRK-like protein 1                                          | Synaptogenesis                         | 3 v 13  | -0.85 | 0.049 |
| S6BGEO | Unknown    | IgG H chain                                                           | Immune response                        | 8 v 20  | 0.44  | 0.049 |

**Additional file Table 4 :** Significantly altered protein abundances between POLD vs PTc

| UniProt Accession | Gene Name | Protein Name                                         | Protein Function                          | POLD vs PTc (n = 21 v 112) |                     |          |
|-------------------|-----------|------------------------------------------------------|-------------------------------------------|----------------------------|---------------------|----------|
|                   |           |                                                      |                                           | Replicates                 | Log <sub>2</sub> FC | p        |
| B2R582            | Unknown   | cDNA, FLJ92374, highly similar to CLEC3B, mRNA       | Unknown                                   | 2 v 12                     | -1.59               | 0.000003 |
| Q9UHF0            | TAC3      | Tachykinin-3                                         | Neuropeptide                              | 3 v 22                     | 0.64                | 0.0001   |
| Q96IU4            | ABHD14B   | Protein ABHD14B                                      | Acyltransferase                           | 2 v 11                     | -1.01               | 0.0003   |
| C9IY11            | DMKN      | Dermokine                                            | Cornified envelope assembly               | 10 v 39                    | 1.06                | 0.002    |
| P01709            | IGLV2-8   | Immunoglobulin lambda variable 2-8                   | Antigen recognition                       | 21 v 105                   | 0.35                | 0.002    |
| P42785            | PRCP      | Lysosomal Pro-X carboxypeptidase                     | Carboxypeptidase                          | 7 v 25                     | 0.67                | 0.002    |
| P31151            | S100A7    | Protein S100-A7 (Psoriasin)                          | Inflammatory/immune response              | 21 v 106                   | 0.97                | 0.003    |
| AOA494COG5        | AGRN      | Agryn                                                | Developmental protein                     | 8 v 60                     | 0.75                | 0.004    |
| Q8WZ75            | ROBO4     | Roundabout homolog 4                                 | Developmental protein, angiogenesis       | 21 v 111                   | 0.43                | 0.004    |
| P13473            | LAMP2     | Lysosome-associated membrane glycoprotein 2          | Autophagy                                 | 20 v 98                    | 0.51                | 0.006    |
| Q58FF6            | HSP90AB4P | Putative heat shock protein HSP 90-beta 4            | Molecular chaperone, stress response      | 15 v 63                    | 1.04                | 0.009    |
| Q8NDA2            | HMCN2     | Hemicentin-2                                         | Extracellular matrix                      | 2 v 22                     | -0.68               | 0.009    |
| Q92692            | NECTIN2   | Nectin-2                                             | Modulator of T-cell signalling            | 15 v 64                    | 0.38                | 0.012    |
| Q99497            | PARK7     | Parkinson disease protein 7                          | Cell protection from oxidative stress     | 5 v 15                     | 0.66                | 0.017    |
| P08779            | KRT16     | Keratin, type I cytoskeletal 16                      | Cytokeratin                               | 11 v 81                    | 0.50                | 0.017    |
| Q9UMS6            | SYNPO2    | Synaptopodin-2                                       | Actin binding, cell migration             | 21 v 107                   | -0.49               | 0.017    |
| P61970            | NUTF2     | Nuclear transport factor 2                           | mRNA transport                            | 16 v 87                    | 0.37                | 0.017    |
| Q15274            | QPRT      | Nicotinate-nucleotide pyrophosphorylase              | Pyridine nucleotide biosynthesis          | 3 v 11                     | 1.40                | 0.018    |
| P14780            | MMP9      | Matrix metalloproteinase-9                           | Collagen degradation, leukocyte migration | 21 v 105                   | 0.30                | 0.018    |
| Q96RR4            | CAMKK2    | Calcium/calmodulin-dependent protein kinase kinase 2 | Serine/threonine-protein kinase           | 8 v 42                     | 1.37                | 0.020    |
| P41181            | AQP2      | Aquaporin-2                                          | Fluid balance                             | 14 v 70                    | 0.63                | 0.021    |
| P15289            | ARSA      | Arylsulfatase A                                      | Lipid metabolism                          | 19 v 76                    | 0.60                | 0.021    |
| P05543            | SERPINA7  | Thyroxine-binding globulin                           | Thyroid hormone transport protein         | 19 v 96                    | 0.55                | 0.023    |
| O95865            | DDAH2     | N(G),N(G)-dimethylarginine dimethylaminohydrolase 2  | Regulation of nitric oxide production     | 2 v 7                      | 0.44                | 0.023    |
| P31944            | CASP14    | Caspase-14                                           | Epidermal differentiation                 | 18 v 87                    | 0.46                | 0.024    |
| Q969E1            | LEAP2     | Liver-expressed antimicrobial peptide 2              | Antimicrobial                             | 18 v 99                    | 1.14                | 0.024    |
| P29966            | MARCKS    | Myristoylated alanine-rich C-kinase substrate        | Actin/Calmodulin-binding                  | 2 v 8                      | -0.45               | 0.025    |
| P25815            | S100P     | Protein S100-P                                       | Calcium signalling                        | 15 v 85                    | 0.42                | 0.027    |
| P05091            | ALDH2     | Aldehyde dehydrogenase, mitochondrial                | Oxidoreductase                            | 4 v 26                     | 0.43                | 0.029    |
| P01019            | AGT       | Angiotensinogen                                      | Regulation of blood pressure              | 5 v 28                     | 0.55                | 0.030    |
| P07998            | RNASE1    | Ribonuclease pancreatic                              | Endonuclease                              | 21 v 111                   | 0.32                | 0.030    |
| Q96HD1            | CRELD1    | Protein disulfide isomerase                          | Isomerase                                 | 2 v 16                     | 0.55                | 0.031    |
| P05109            | S100A8    | Protein S100-A8                                      | Inflammatory/immune response              | 21 v 107                   | 0.69                | 0.034    |
| P00738            | HP        | Haptoglobin                                          | Haemoglobin recycling                     | 21 v 111                   | 0.55                | 0.035    |
| P39059            | COL15A1   | Collagen alpha-1(XV) chain                           | Stabilizes microvessels/muscle cells      | 14 v 74                    | 0.39                | 0.035    |
| Q03154            | ACY1      | Aminoacylase-1                                       | Hydrolase                                 | 4 v 18                     | 0.65                | 0.035    |
| P53634            | CTSC      | Dipeptidyl peptidase 1 (Cathepsin C)                 | Thiol protease                            | 19 v 77                    | 0.31                | 0.038    |
| Q9Y4C0            | NRXN3     | Neurexin-3                                           | Neuronal cell adhesion/recognition        | 16 v 50                    | 0.46                | 0.038    |
| Q96K68            | Unknown   | cDNA FLJ14473 fis, SNC73 mRNA                        | Unknown                                   | 21 v 111                   | 0.28                | 0.042    |
| O75882            | ATRN      | Attractin                                            | Inflammatory response                     | 21 v 97                    | 0.30                | 0.043    |
| Q9NZH0            | GPRC5B    | G-protein coupled receptor family C group 5 member B | Unknown                                   | 16 v 86                    | 0.37                | 0.045    |



|        |       |                               |                    |          |       |       |
|--------|-------|-------------------------------|--------------------|----------|-------|-------|
| P43652 | AFM   | Afamin                        | Protein transport  | 21 v 111 | -0.27 | 0.047 |
| P68032 | ACTC1 | Actin, alpha cardiac muscle 1 | Cytoskeleton       | 21 v 107 | 0.24  | 0.048 |
| P51654 | GPC3  | Glypican-3                    | Protease inhibitor | 9 v 49   | -0.54 | 0.049 |

**Additional file Table 5 :** Significantly altered protein abundances between POLD vs Term-born children

| UniProt Accession | Gene Name              | Protein Name                                                         | Protein Function                        | POLD vs Term (n = 21 v 46) |                     |        |
|-------------------|------------------------|----------------------------------------------------------------------|-----------------------------------------|----------------------------|---------------------|--------|
|                   |                        |                                                                      |                                         | Replicates                 | Log <sub>2</sub> FC | p      |
| Q9HCU0            | CD248                  | Endosialin                                                           | Calcium binding/extra-cellular matrix   | 21 v 46                    | 0.33                | 0.0003 |
| O15370            | SOX12                  | Transcription factor SOX-12                                          | Transcription factor                    | 5 v 7                      | -2.05               | 0.0003 |
| Q16610            | ECM1                   | Extracellular matrix protein 1                                       | Multifunctional, protease binding       | 6 v 15                     | -1.49               | 0.0004 |
| P69905            | HBA1; HBA2             | Hemoglobin subunit alpha                                             | Oxygen transport                        | 11 v 37                    | 1.31                | 0.0004 |
| C9IY11            | DMKN                   | Dermokine                                                            | Cornified envelope assembly             | 10 v 15                    | 1.21                | 0.001  |
| Q08380            | LGALS3BP               | Galectin-3-binding protein                                           | Cell adhesion                           | 21 v 46                    | -0.58               | 0.001  |
| Q8WZ75            | ROBO4                  | Roundabout homolog 4                                                 | Developmental protein, angiogenesis     | 21 v 46                    | 0.60                | 0.001  |
| Q14050            | COL9A3                 | Collagen alpha-3(IX) chain                                           | Extracellular matrix                    | 8 v 7                      | 0.70                | 0.001  |
| A0A0S2Z4G4        | TPM3                   | Tropomyosin 3 isoform 1 (Fragment)                                   | Actin-binding                           | 2 v 12                     | 0.64                | 0.002  |
| Q9UNN8            | PROCR                  | Endothelial protein C receptor                                       | Blood coagulation                       | 21 v 46                    | 0.49                | 0.003  |
| O75594            | PGLYRP1                | Peptidoglycan recognition protein 1                                  | Innate immunity                         | 21 v 45                    | 0.60                | 0.003  |
| P98160            | HSPG2                  | Basement membrane-specific heparan sulfate proteoglycan core protein | Basement membrane/angiogenesis          | 21 v 46                    | 0.28                | 0.003  |
| P15151            | PVR                    | Poliovirus receptor                                                  | Natural killer cell adhesion/activation | 14 v 22                    | 0.93                | 0.004  |
| P40189            | IL6ST                  | Interleukin-6 receptor subunit beta                                  | Cytokine binding                        | 2 v 2                      | 1.30                | 0.004  |
| P61970            | NUTF2                  | Nuclear transport factor 2                                           | mRNA transport                          | 16 v 41                    | 0.64                | 0.004  |
| P17936            | IGFBP3                 | Insulin-like growth factor-binding protein 3                         | Growth regulation                       | 16 v 31                    | 1.39                | 0.005  |
| U6FVB0            | CD74-Ntrk1 fusion gene | Tyrosine-protein kinase receptor                                     | Tyrosine-protein kinase                 | 19 v 39                    | -0.51               | 0.005  |
| Q16270            | IGFBP7                 | Insulin-like growth factor-binding protein 7                         | Growth regulation                       | 21 v 46                    | -0.80               | 0.006  |
| P07998            | RNASE1                 | Ribonuclease pancreatic                                              | Endonuclease                            | 21 v 46                    | 0.45                | 0.008  |
| D3DNU8            | KNG1                   | Kininogen 1, isoform CRA_a                                           | Vasodilation                            | 21 v 46                    | -0.50               | 0.008  |
| P09603            | CSF1                   | Macrophage colony-stimulating factor 1                               | Cytokine                                | 20 v 39                    | 0.46                | 0.009  |
| P19827            | ITIH1                  | Inter-alpha-trypsin inhibitor heavy chain H1                         | Serine protease inhibitor               | 7 v 24                     | 0.78                | 0.009  |
| P05154            | SERPINA5               | Plasma serine protease inhibitor                                     | Serine protease inhibitor               | 19 v 46                    | -0.52               | 0.010  |
| P61916            | NPC2                   | NPC intracellular cholesterol transporter 2                          | Cholesterol metabolism                  | 9 v 23                     | 0.52                | 0.011  |
| P00738            | HP                     | Haptoglobin                                                          | Haemoglobin recycling                   | 21 v 46                    | 0.72                | 0.011  |
| P07900            | HSP90AA1               | Heat shock protein HSP 90-alpha                                      | Molecular chaperone                     | 2 v 12                     | 0.71                | 0.012  |
| P01024            | C3                     | Complement C3                                                        | Innate immunity                         | 19 v 46                    | -0.35               | 0.012  |
| Q9UQV4            | LAMP3                  | Lysosome-associated membrane glycoprotein 3                          | Adaptive immunity                       | 15 v 34                    | -0.49               | 0.013  |
| Q4TZM4            | HBB                    | Hemoglobin beta chain (Fragment)                                     | Oxygen transport                        | 4 v 7                      | 2.21                | 0.013  |
| P51654            | GPC3                   | Glypican-3                                                           | Protease inhibitor                      | 9 v 24                     | -0.77               | 0.013  |
| Q8NDA2            | HMCN2                  | Hemicentin-2                                                         | Extracellular matrix                    | 2 v 9                      | -0.65               | 0.013  |
| Q96S96            | PEBP4                  | Phosphatidylethanolamine-binding protein 4                           | Extracellular exosome                   | 12 v 18                    | 0.74                | 0.013  |
| A0A494C0G5        | AGRN                   | Agrin                                                                | Developmental protein                   | 8 v 5                      | 0.62                | 0.013  |
| Q14982            | OPCML                  | Opioid-binding protein/cell adhesion molecule                        | Cell adhesion/opioid binding            | 15 v 45                    | -0.35               | 0.014  |

|            |          |                                                                 |                                           |         |       |       |
|------------|----------|-----------------------------------------------------------------|-------------------------------------------|---------|-------|-------|
| P01019     | AGT      | Angiotensinogen                                                 | Regulation of blood pressure              | 5 v 8   | 1.02  | 0.014 |
| Q99985     | SEMA3C   | Semaphorin-3C                                                   | Developmental protein                     | 8 v 14  | 2.13  | 0.015 |
| P13473     | LAMP2    | Lysosome-associated membrane glycoprotein 2                     | Autophagy                                 | 20 v 46 | 0.50  | 0.015 |
| P19652     | ORM2     | Alpha-1-acid glycoprotein 2                                     | Transport protein                         | 23 v 46 | -0.46 | 0.016 |
| P08779     | KRT16    | Keratin, type I cytoskeletal 16                                 | Cytokeratin                               | 11 v 38 | 0.52  | 0.017 |
| P19835     | CEL      | Bile salt-activated lipase                                      | Serine esterase, lipid degradation        | 15 v 22 | 0.57  | 0.018 |
| O43866     | CD5L     | CD5 antigen-like (Apoptosis inhibitor expressed by macrophages) | Inflammatory response regulation          | 8 v 25  | -0.79 | 0.018 |
| P42785     | PRCP     | Lysosomal Pro-X carboxypeptidase                                | Carboxypeptidase                          | 7 v 28  | 0.46  | 0.019 |
| P41181     | AQP2     | Aquaporin-2                                                     | Fluid balance                             | 14 v 46 | 0.69  | 0.020 |
| P39059     | COL15A1  | Collagen alpha-1(XV) chain                                      | Stabilizes microvessels/muscle cells      | 14 v 24 | 0.46  | 0.020 |
| P0DOX7     | Unknown  | Immunoglobulin kappa light chain                                | Immune response                           | 7 v 17  | 0.55  | 0.020 |
| P52848     | NDST1    | Bifunctional heparan sulfate N-deacetylase/N-sulfotransferase 1 | Multifunctional enzyme/immune response    | 21 v 44 | -0.92 | 0.021 |
| O15240     | VGF      | Neurosecretory protein VGF                                      | Neurogenesis/neuroplasticity              | 21 v 46 | -0.49 | 0.021 |
| Q96K68     | Unknown  | cDNA FLJ14473 fis                                               | Cell membrane                             | 21 v 46 | 0.33  | 0.021 |
| P00749     | PLAU     | Urokinase-type plasminogen activator                            | Plasminogen activator                     | 13 v 31 | -0.53 | 0.022 |
| A0A193CHQ9 | Unknown  | 10E8 heavy chain variable region (Fragment)                     | Unknown                                   | 19 v 43 | 0.53  | 0.023 |
| Q9UMX5     | NENF     | Neudesin                                                        | Neurotrophic factor                       | 14 v 21 | 0.48  | 0.025 |
| A8TX70     | COL6A5   | Collagen alpha-5(VI) chain                                      | Cell-binding protein                      | 16 v 28 | -0.52 | 0.025 |
| P15144     | ANPEP    | Aminopeptidase N                                                | Aminopeptidase                            | 20 v 38 | 0.39  | 0.025 |
| A0A140T9A1 | COL11A2  | Collagen alpha-2(XI) chain                                      | Extracellular matrix                      | 20 v 36 | -0.55 | 0.029 |
| Q6UVK1     | CSPG4    | Chondroitin sulfate proteoglycan 4                              | Cell proliferation/migration              | 21 v 46 | 0.58  | 0.031 |
| P78380     | OLR1     | Oxidized low-density lipoprotein receptor 1                     | Inflammatory response                     | 4 v 18  | -0.44 | 0.033 |
| P29508     | SERPINB3 | Serpin B3                                                       | Serine protease inhibitor                 | 11 v 25 | 0.61  | 0.036 |
| P98095     | FBLN2    | Fibulin-2                                                       | Binds to fibronectin                      | 21 v 46 | 0.31  | 0.039 |
| Q9NZH0     | GPRC5B   | G-protein coupled receptor family C group 5 member B            | Unknown                                   | 16 v 34 | 0.43  | 0.039 |
| Q9NRX4     | PHPT1    | 14 kDa phosphohistidine phosphatase                             | Protein phosphatase                       | 7 v 11  | 0.89  | 0.039 |
| A0A2U8J953 | IgH      | Ig heavy chain variable region (Fragment)                       | Immune response                           | 6 v 7   | -1.25 | 0.041 |
| P43121     | MCAM     | Cell surface glycoprotein MUC18                                 | Cell adhesion                             | 21 v 46 | 0.45  | 0.044 |
| P02774     | GC       | Vitamin D-binding protein                                       | Vitamin D transport/storage               | 8 v 14  | -1.17 | 0.045 |
| P01133     | EGF      | Pro-epidermal growth factor                                     | Growth factor                             | 21 v 46 | -0.42 | 0.045 |
| P01709     | IGLV2-8  | Immunoglobulin lambda variable 2-8                              | Antigen recognition                       | 21 v 46 | 0.30  | 0.045 |
| P33908     | MAN1A1   | Mannosyl-oligosaccharide 1,2-alpha-mannosidase IA               | Glycosidase/hydrolase                     | 18 v 35 | -0.39 | 0.045 |
| P02766     | TTR      | Transthyretin                                                   | Thyroid hormone-binding protein           | 21 v 41 | 0.50  | 0.046 |
| P14780     | MMP9     | Matrix metalloproteinase-9                                      | Collagen degradation, leukocyte migration | 21 v 46 | 0.26  | 0.046 |
| Q12860     | CNTN1    | Contactin-1                                                     | Cell adhesion/signalling                  | 17 v 45 | -0.36 | 0.048 |
| Q8NEJ1     | Unknown  | Immunoglobulin lambda-1 light chain-like                        | Cell membrane                             | 3 v 7   | -1.05 | 0.048 |

**Additional file Table 6:** ROC Analysis (using Leave-One-Out Cross Validation model) of high replicate proteins implicated in related biological functions by IPA software. POLD: Prematurity-related obstructive lung disease. pPRISm: Prematurity-related preserved ratio with impaired spirometry. PT<sub>c</sub>: Preterm-born controls. PPV: Positive predictive value. NPV: Negative predictive value

| Protein(s) included in model                 | Replicates | AUC (95% CI)      | p-value | Sensitivity (95% CI) | Specificity (95% CI) | PPV (95% CI)      | NPV (95% CI)      |
|----------------------------------------------|------------|-------------------|---------|----------------------|----------------------|-------------------|-------------------|
| <b>pPRISm vs PT<sub>c</sub> (n=27 v 112)</b> |            |                   |         |                      |                      |                   |                   |
| <b>DNASE1</b>                                | 27 v 112   | 0.62 (0.51, 0.74) | 0.024   | 0.56 (0.37, 0.74)    | 0.69 (0.61, 0.78)    | 0.31 (0.18, 0.44) | 0.87 (0.79, 0.94) |
| <b>PGLYRP1</b>                               | 27 v 112   | 0.61 (0.53, 0.70) | 0.005   | 0.54 (0.40, 0.67)    | 0.67 (0.61, 0.73)    | 0.28 (0.20, 0.37) | 0.86 (0.80, 0.91) |
| <b>B2M</b>                                   | 27 v 112   | 0.58 (0.46, 0.71) | 0.91    | 0.59 (0.41, 0.78)    | 0.64 (0.55, 0.73)    | 0.29 (0.17, 0.40) | 0.87 (0.79, 0.94) |
| <b>SERPINA3</b>                              | 25 v 100   | 0.63 (0.49, 0.76) | 0.97    | 0.48 (0.28, 0.68)    | 0.80 (0.72, 0.88)    | 0.38 (0.21, 0.54) | 0.86 (0.79, 0.93) |
| <b>DNASE1 + PGLYRP1 + B2M + SERPINA3</b>     | 25 v 100   | 0.65 (0.52, 0.78) | 0.010   | 0.76 (0.59, 0.93)    | 0.66 (0.57, 0.75)    | 0.36 (0.23, 0.49) | 0.92 (0.85, 0.98) |
| <b>POLD vs PT<sub>c</sub> (n=21 v 112)</b>   |            |                   |         |                      |                      |                   |                   |
| <b>S100A8</b>                                | 21 v 107   | 0.59 (0.47, 0.72) | 0.92    | 0.82 (0.66, 0.98)    | 0.45 (0.35, 0.54)    | 0.23 (0.14, 0.33) | 0.92 (0.85, 0.99) |
| <b>MMP9</b>                                  | 21 v 105   | 0.59 (0.45, 0.73) | 0.90    | 0.38 (0.17, 0.59)    | 0.84 (0.77, 0.91)    | 0.32 (0.14, 0.50) | 0.87 (0.81, 0.94) |
| <b>CTSC</b>                                  | 19 v 77    | 0.59 (0.46, 0.73) | 0.90    | 0.58 (0.36, 0.80)    | 0.66 (0.56, 0.77)    | 0.30 (0.15, 0.45) | 0.86 (0.78, 0.95) |
| <b>S100A8 + MMP9 + CTSC</b>                  | 19 v 77    | 0.72 (0.57, 0.86) | 0.002   | 0.47 (0.25, 0.70)    | 0.91 (0.85, 0.97)    | 0.56 (0.32, 0.81) | 0.88 (0.80, 0.95) |

**Additional file Figure 3:** ROC Curves (using Leave-One-Out Cross Validation model) of protein groups with highest AUC values (A) pPRISm vs PT<sub>c</sub> including DNASE1, PGLYRP1, B2M and SERPINA3 (B) POLD vs PT<sub>c</sub> including S100A8, MMP9 and CTSC. POLD: Prematurity-related obstructive lung disease. pPRISm: Prematurity-related preserved ratio with impaired spirometry. PT<sub>c</sub>: Preterm-born controls

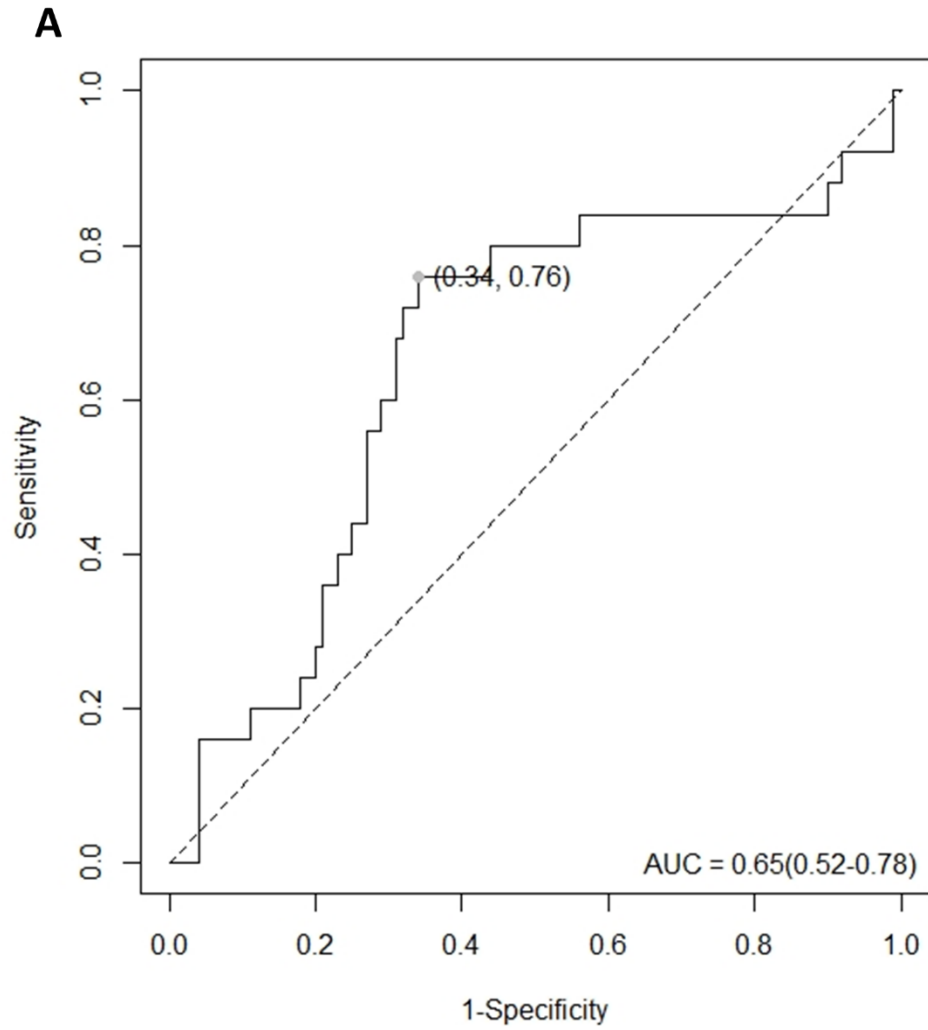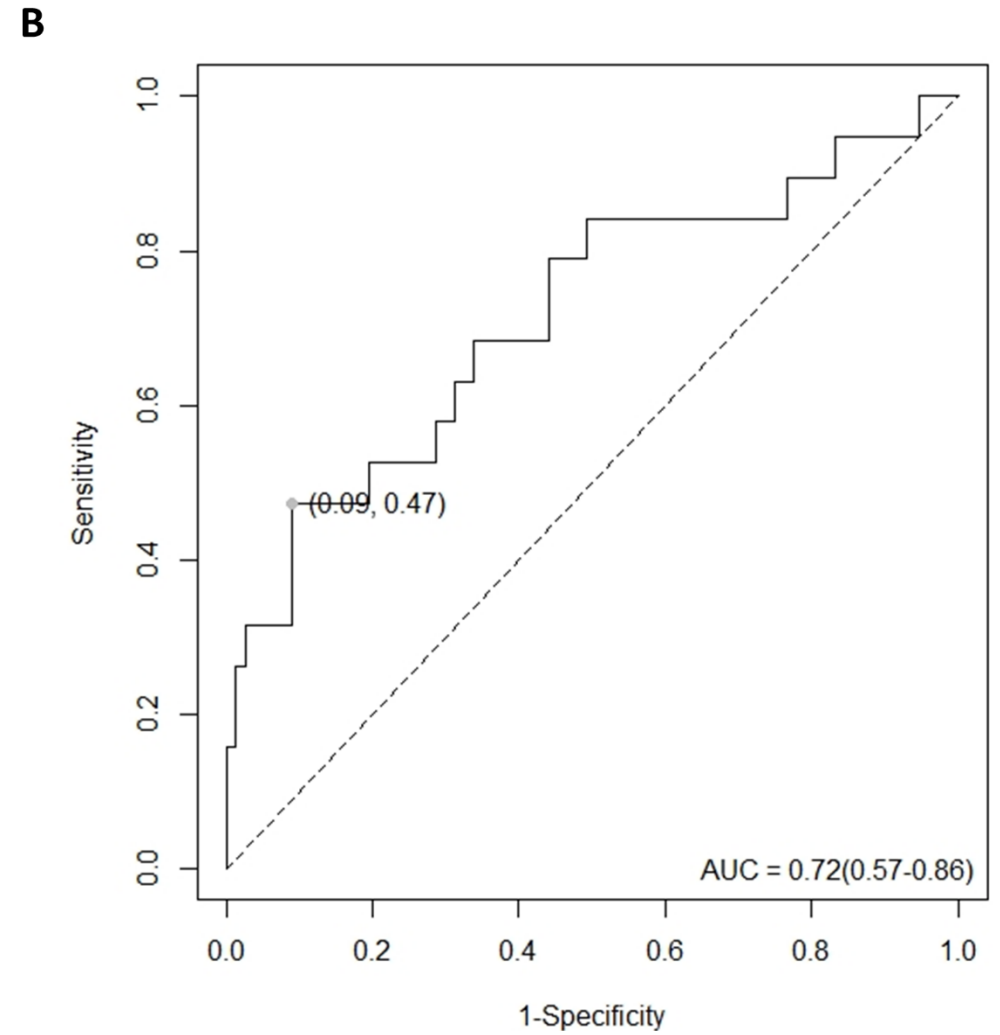

Supplement: MOESM1 [file 25826566]
